# Supplementary material
Source: PubMed Central journal article supplement (PMC7749029)
Supplement: NIHMS1601520-supplement-1.pdf [file NIHMS1601520-supplement-1.pdf]

## Supplementary Material

### **Neutrophil expressed CD47 regulates CD11b/CD18-dependent neutrophil transepithelial migration in the intestine *in vivo*.**

**Authors:** Veronica Azcutia PhD<sup>1\*</sup>, Matthias Kelm MD<sup>1</sup>, Anny-Claude Luissint PhD<sup>1</sup>, Kevin Boerner MD<sup>1</sup>, Sven Flemming MD<sup>1</sup>, Miguel Quiros PhD<sup>1</sup>, Gail Newton PhD<sup>2,3</sup>, Asma Nusrat MD<sup>1</sup>, Francis W. Luscinskas PhD<sup>2,3</sup>, Charles A. Parkos MD, PhD<sup>1\*</sup>

- Supplementary Figures
- Supplementary Methods

## Supplementary Figure 1

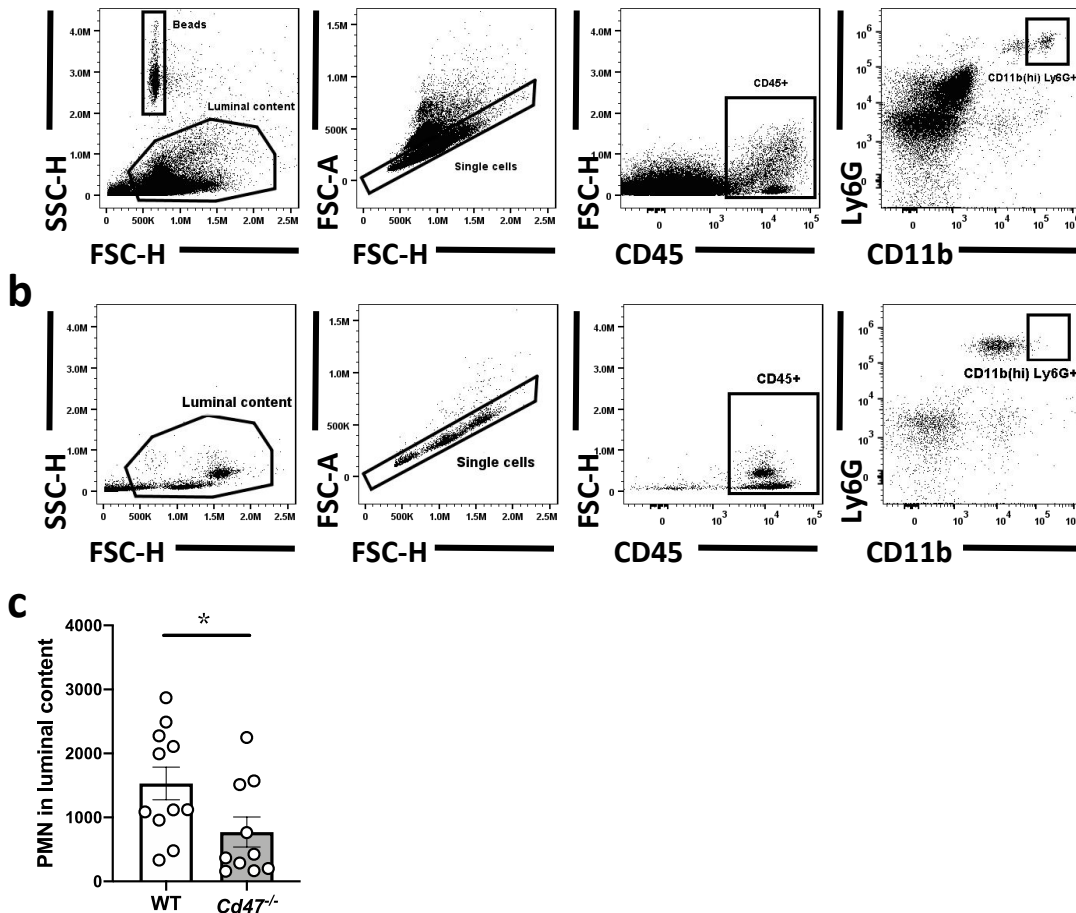

**Supplementary Fig. 1. Flow cytometry analysis of PMN migrated into luminal content *in vivo*.** **a** Transmigrated PMN into the intestinal lumen were identified as CD45<sup>+</sup> CD11b<sup>high</sup> Ly6G<sup>+</sup> by flow cytometry. **b** Circulating PMN in peripheral blood, identified as CD45<sup>+</sup> CD11b<sup>low</sup> Ly6G<sup>+</sup>, were excluded in gating analysis of transmigrated PMN into the luminal space (TEpM). **c** Analysis of PMN TEpM *in vivo* using a proximal colon loop model reveals that *Cd47*<sup>-/-</sup> mice have significantly reduced numbers of PMN that migrated to the intestinal lumen 1 hr after intraluminal instillation of leukotriene B<sub>4</sub> (LTB<sub>4</sub>; 1 nM) compared with WT mice. Dots represent individual mice. Data are Means ± SEM of three independent experiments, 10-11 mice/group (\*p ≤ 0.05) as determined by Mann-Whitney U test.

## Supplementary Figure 2

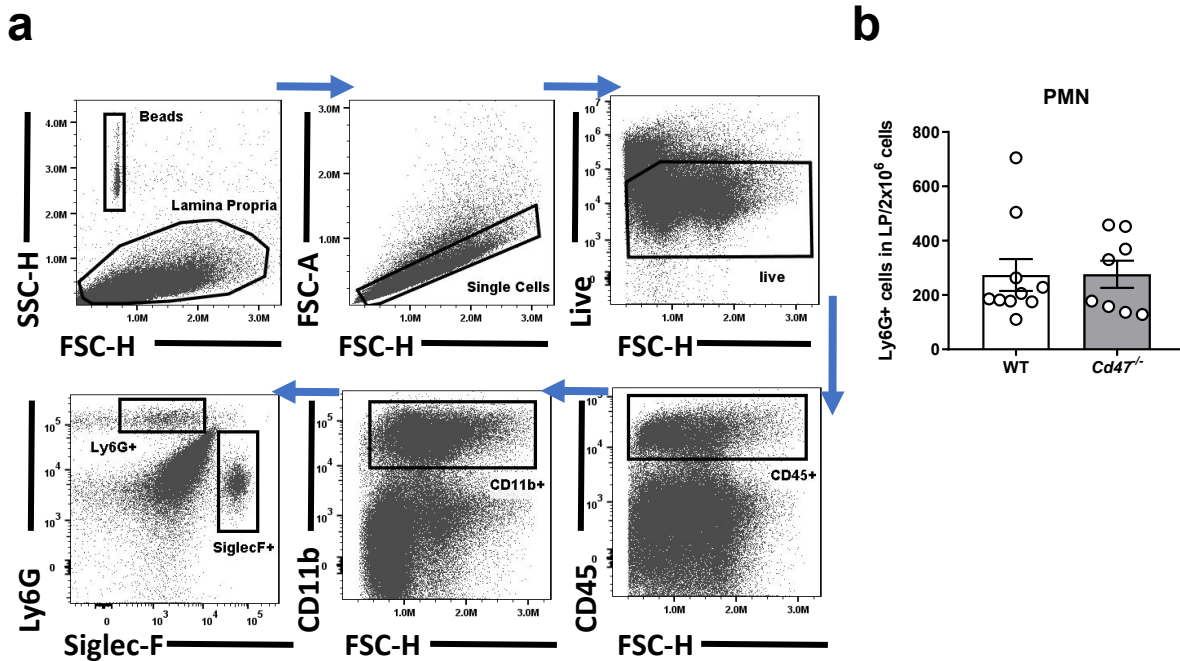

**Supplementary Fig. 2. Flow cytometry analysis of PMN infiltration into lamina propria upon cytokine stimulation.** Lamina propria enriched fraction was isolated from WT and *Cd47*<sup>-/-</sup> mouse intestine after combined cytokine stimulation with IFN- $\gamma$  (100 ng) and TNF- $\alpha$  (100 ng) for 24 hr. **a** PMN were identified as CD45<sup>+</sup> CD11b<sup>+</sup> Ly6G<sup>+</sup> SiglecF<sup>-</sup>. **b** Cytokine stimulation elicited similar responses in WT and *Cd47*<sup>-/-</sup> mice and numbers of PMN accumulated in LP fraction before TEpM assay were not significantly different. Data are Means  $\pm$  SEM of three independent experiments, 9-10 mice/group.

## Supplementary Figure 3

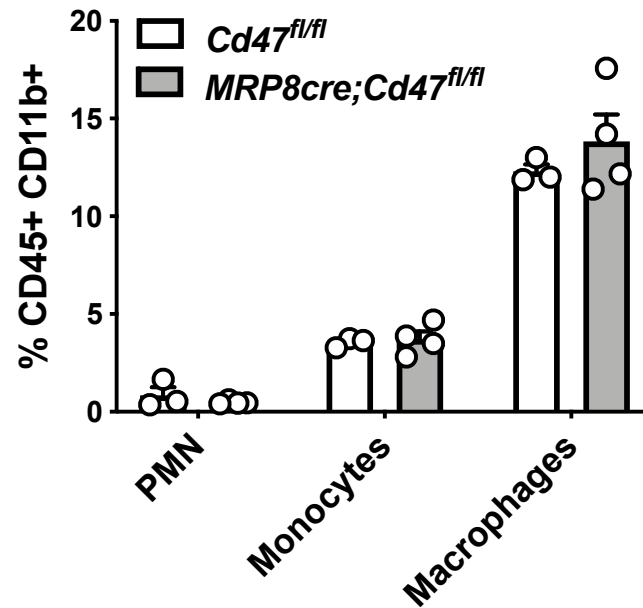

**Supplementary Fig. 3. *MRP8-cre;Cd47<sup>fl/fl</sup>* mice did not present spontaneous mucosal inflammation at baseline.** Lamina propria enriched fraction was isolated from non-stimulated *MRP8-cre;Cd47<sup>fl/fl</sup>* and *Cd47<sup>fl/fl</sup>* mice. Myeloid cells present in the subepithelial space were quantified by flow cytometric analysis and cells were identified as follows: PMN (CD45<sup>+</sup> CD11b<sup>+</sup> Ly6G<sup>+</sup> SiglecF<sup>-</sup>); Monocytes (CD45<sup>+</sup> CD11b<sup>+</sup> Ly6G<sup>-</sup> SiglecF<sup>-</sup> Ly6C<sup>high</sup> F4/80<sup>low</sup>); Macrophages (CD45<sup>+</sup> CD11b<sup>+</sup> Ly6G<sup>+</sup> SiglecF<sup>-</sup> Ly6C<sup>low</sup> F4/80<sup>high</sup>). Percentage of cells was not significantly different between *MRP8-cre;Cd47<sup>fl/fl</sup>* and *Cd47<sup>fl/fl</sup>* mice. Data are Means  $\pm$  SEM of three independent experiments, 3-4 mice/group.

## Supplementary Figure 4

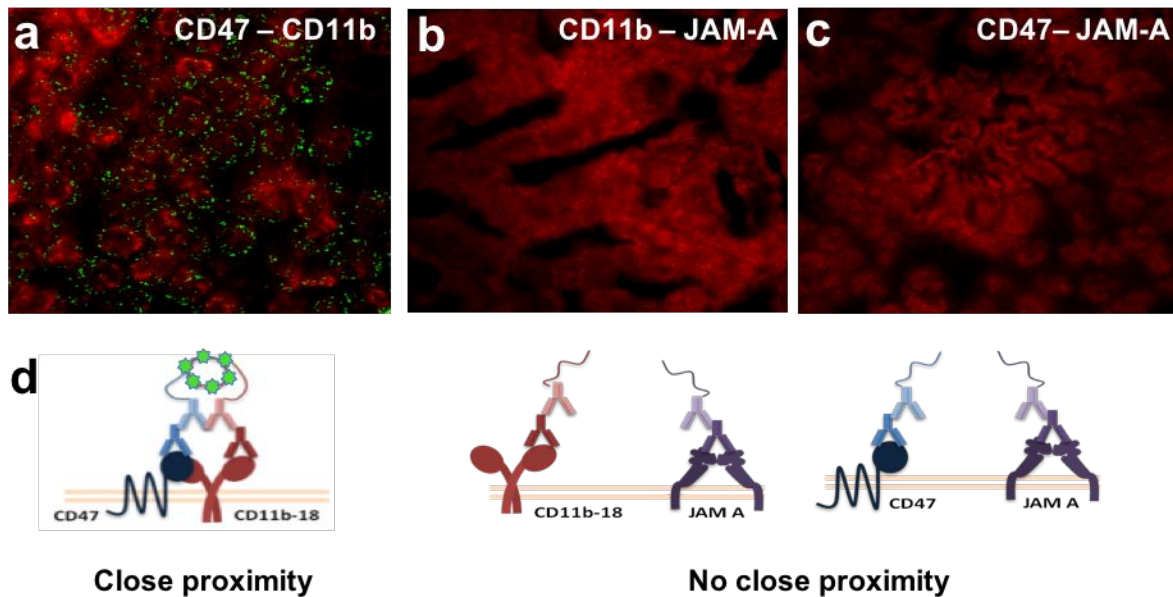

**Supplementary Fig. 4. CD47 physically associates with CD11b in circulating human PMN. a** CD47 and CD11b association on human PMN was assessed by PLA using anti-human CD47 (clone C5D5) and polyclonal anti-human CD11b Abs. A green positive fluorescent signal indicates close proximity (<40nm) between CD47 and CD11b. **b** Combinations of CD47 and polyclonal goat against JAM-A Abs, and **c** CD11b and JAM-A mAbs did not elicit a fluorescent signal indicating no close interaction between these proteins. Actin filaments were counterstained with Alexa Fluor-555 conjugated phalloidin. **d** Scheme of PLA fundamental.

## Supplementary Methods

### *Antibodies:*

Antibodies anti-human CD47 (B6H12.2) and anti-human CD18 (TS1/18.1.2.11) were purified from supernatants of hybridoma cells obtained from the American Tissue Culture Collection (ATCC; Manassas, VA). Antibodies against human CD47 (C5/D5) were produced in our laboratory.<sup>1</sup> Function blocking LEAF™ antibodies to mouse CD11b (M1/70), CD47 (miap301), CD11a (M1/17), CD18 (M18/2), rat IgG<sub>2b</sub> isotype (RTK4530), and anti-mouse conjugated antibodies PE-CD11b (M1/70), PercP-CD45 (30-F11), PE-Cy7-Ly6C (HK1.4), Brilliant Violet (BV)605-Ly6G (1A8), Alexa Fluor(AF)488-CD18 (m24), and human and mouse Fc receptor blocking antibodies (TruStain FcX™) were purchased from Biolegend (San Diego, CA). Rabbit anti-human CD11b (EP1345Y) and anti-mouse CD11b (EPR19387) were from Abcam (Cambridge, MA). APC-conjugated anti-human CD11b (CBRM1/5), Fixable Viability Dye eFluor780 and the non-conjugated rat anti-mouse Ly6G/Gr1 (RB6-8C5) were from eBiosciences (San Diego, CA). AF647-F4/80 (BM8) and AF647-Ly6G (1A8) were purchased from Invitrogen; BV421-Siglec-F (E50-2440) and AF488-anti-human CD11b (ICRF44) were purchased from BD Biosciences (San Jose, CA).

### *Immunoprecipitation and Immunoblotting*

BMN were solubilized in cold lysis buffer (HBSS<sup>+</sup> supplemented with 1% Triton X-100, 1 mM PMSF, and 1× protease inhibitor cocktail), followed by sonication. Lysates were incubated with 5 µg of mAbs against murine proteins CD18, CD11a, CD11b, and CD47 for 2 hr at 4°C. The immune complexes were captured by incubation with 50 µL of Protein G-Sepharose 4B overnight at 4°C under end-over-end rotation. Immunoprecipitated proteins were mixed with 2x Laemmli sample

buffer (1:1) complemented with 2-mercaptoethanol and heated for 5 min at 65°C, and loaded into 4-20% precast polyacrylamide gels and transferred to PVDF membrane (Bio-Rad; Hercules, CA). Membranes were blocked with 3% of BSA in Tween-20/Tris-buffered saline (TTBS) for 1 hr, followed by overnight incubation at 4°C with goat anti-CD47 (1:1000) or rabbit anti-calnexin (1:10000; Sigma Cat#C4731) primary Abs. CD11b was detected on HL60 lysates with a rabbit anti-CD11b Ab (1:200). Membranes were washed and incubated with appropriate HRP-conjugated secondary antibodies for 1 hr in TTBS with 5% milk, followed by film development using Pierce ECL Western Substrate (Thermo Scientific, Waltham, MA).

### ***Flow cytometry analysis***

All cytometry stainings were performed in flow cytometry staining buffer (PBS<sup>-</sup> containing 2% FBS) at 4°C and protected from light. PMN from luminal content were stained in the presence of murine Fc-block (1:50) with the following antibodies: PercP-CD45 (1:100), PE-CD11b (1:100), AF647-Ly6G (1:100), for 30 min. To detect PMN in the LP-enriched fraction, 2x10<sup>6</sup> cells were stained with a live/dead discrimination dye (1:1000) for 20 min, followed by incubation with the following antibodies in the presence of Fc-block (1:100): PercP-CD45 (1:200), PE-CD11b (1:200), BV605-Ly6G (1:200), and BV421-SiglecF (1:200) for 30 min. Absolute number of cells was determined by using CountBright counting beads, following manufacturer's recommendations. Analysis of CD11b/CD18 integrin activation was performed on HL60 stimulated with 1 μM of fMLF at 37°C, in the presence of human Fc-block (1:100), APC-conjugated anti-CD11b (CBRM1/5; 1:200) and AF488-conjugated anti-CD18 (m24; 1:200) as previously described.<sup>2</sup> Total levels of CD11b were quantified by using an AF488-conjugated anti-human CD11b (1:200). After stimulation, cells were fixed in 4% PFA/PBS before analysis. Flow cytometry analysis was

performed on a NovoCyte Flow Cytometer (ACEA Biosciences Inc. San Diego, CA). Results were analyzed using FlowJo v10 software (Tree Star, Ashland, OR).

### ***Immunohistochemical staining***

IHC staining was performed on formalin-fixed, paraffin-embedded, 4  $\mu\text{m}$  sections of ileal loop tissue, as previously detailed.<sup>3</sup> All reagents were purchased from Vector Laboratories (Burlingame, CA). Briefly, after de-paraffinization, antigen was retrieved with Antigen Unmasking Solution (1:100). Tissue was then permeabilized with 0.5% Triton X-100, and endogenous peroxidase activity was abolished with Bloxall solution. Ly6G/Gr1 Ab (1:50) was detected with peroxidase-conjugated anti-rat antibody (ImmPRESS HRP anti-rat IgG). The bound complexes were visualized by ImmPACT DAB Peroxidase Substrate, counterstained with hematoxylin QS and mounted in Permount (Thermo-Fisher Scientific). Images were acquired with an Olympus IX73 equipped with a 20x/0.75NA and a 40x/0.60NA lenses, and CellSenses Standard 2.3 software (Olympus Corp).

### ***Proximal Ligation Assay***

Mouse BMN, human PMN and HL60 cells were cytospun at 400 rpm for 5 min. Proximity ligation assays were performed using DuoLink<sup>®</sup> in situ-fluorescence PLA Probes and reagents according to manufacturer's instructions (Millipore Sigma). Images were acquired by a Leica SP5 inverted confocal microscope (Leica Microsystems; Buffalo Grove, IL) equipped with a 100 $\times$ /1.40NA oil lens and Leica Application Suite (LAS 2.7.3.9723). Images were processed using Fiji software (NIH, Bethesda, MD).



## References

1. Parkos CA, Colgan SP, Liang TW, Nusrat A, Bacarra AE, Carnes DK *et al.* CD47 mediates post-adhesive events required for neutrophil migration across polarized intestinal epithelia. *J Cell Biol* 1996; **132**(3): 437-450.
2. Dransfield I, Hogg N. Regulated expression of Mg<sup>2+</sup> binding epitope on leukocyte integrin alpha subunits. *EMBO J* 1989; **8**(12): 3759-3765.
3. Flemming S, Luissint AC, Nusrat A, Parkos CA. Analysis of leukocyte transepithelial migration using an in vivo murine colonic loop model. *JCI Insight* 2018; **3**(20).
